# Supplementary material for: An efficient vanillinyl Schiff base as a turn on fluorescent probe for zinc(ii) and cell imaging
Source: Royal Society of Chemistry journal article supplement (doi:10.1039/c5ra06193h), 2015-01-01
Supplement: c5ra06193h1.pdf [file c5ra06193h1.pdf]

## SUPPLEMENTARY MATERIALS

### An efficient Vanillinyl Schiff base as a turn on fluorescent probe for Zinc(II) and Cell imaging

Anup Kumar Bhanja, Chiranjit Patra, Sudipa Mondal, Durbadal Ojha, Debprasad Chattopadhyay, Chittaranjan Sinha\*

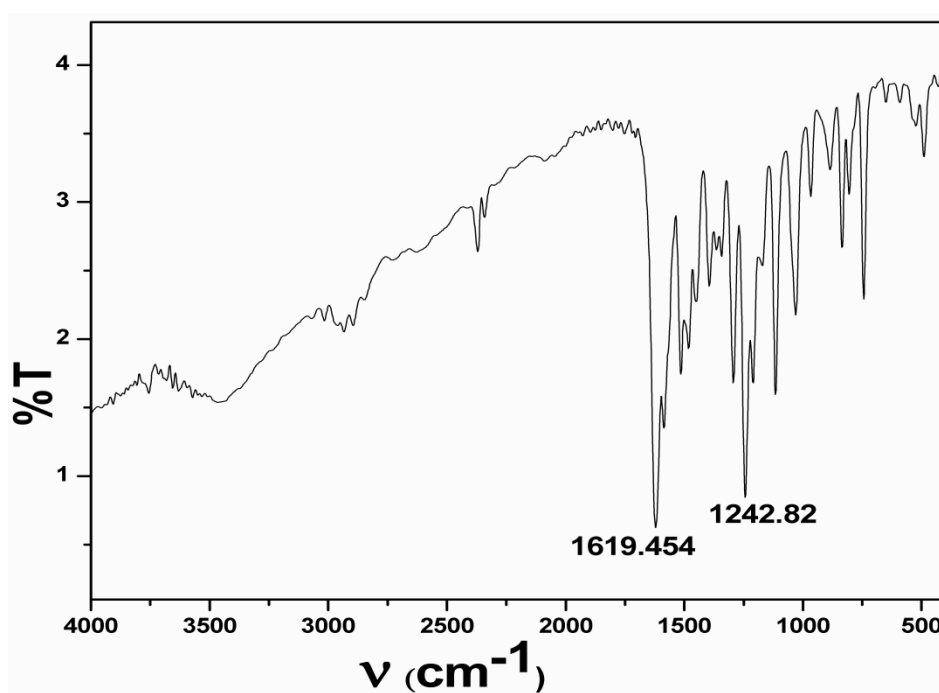

Fig. S1. FT-IR spectrum of H<sub>2</sub>L in KBr disc

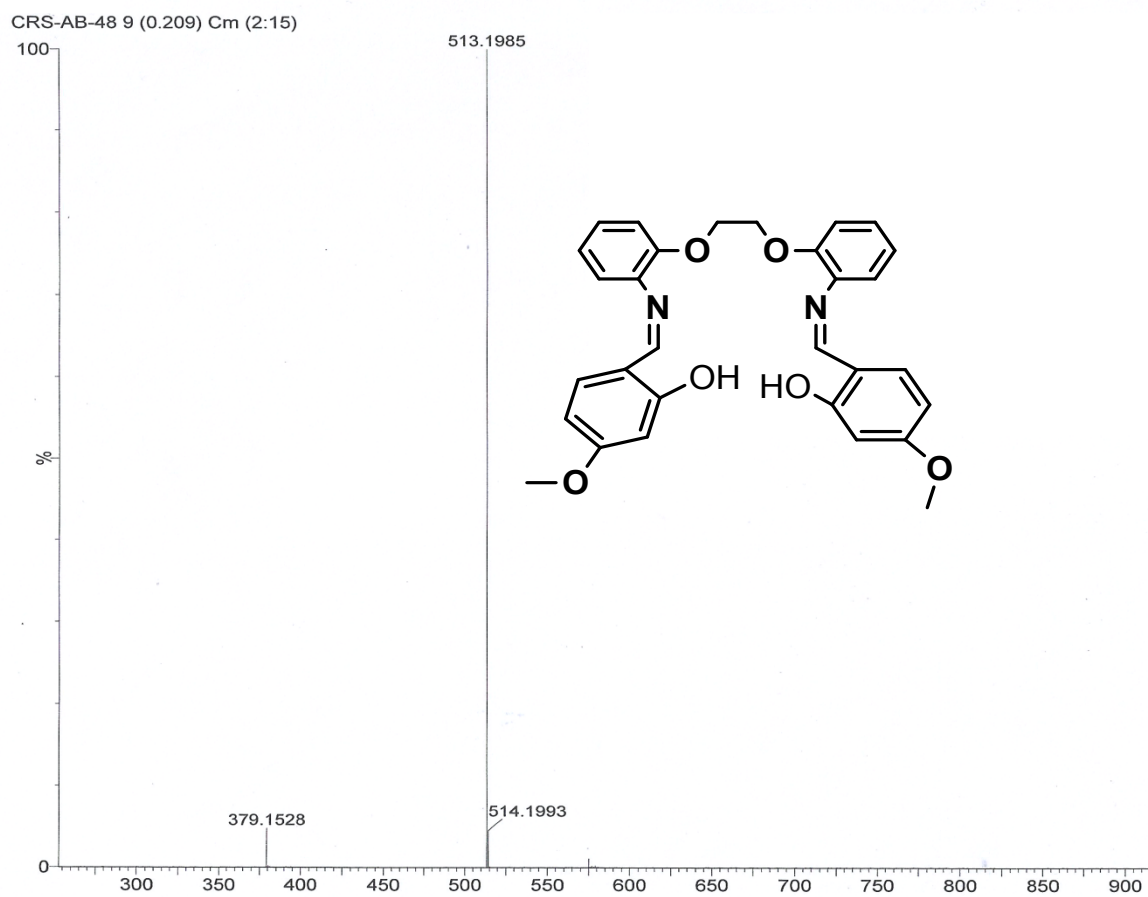

**Fig. S2. Mass spectrum of H<sub>2</sub>L**

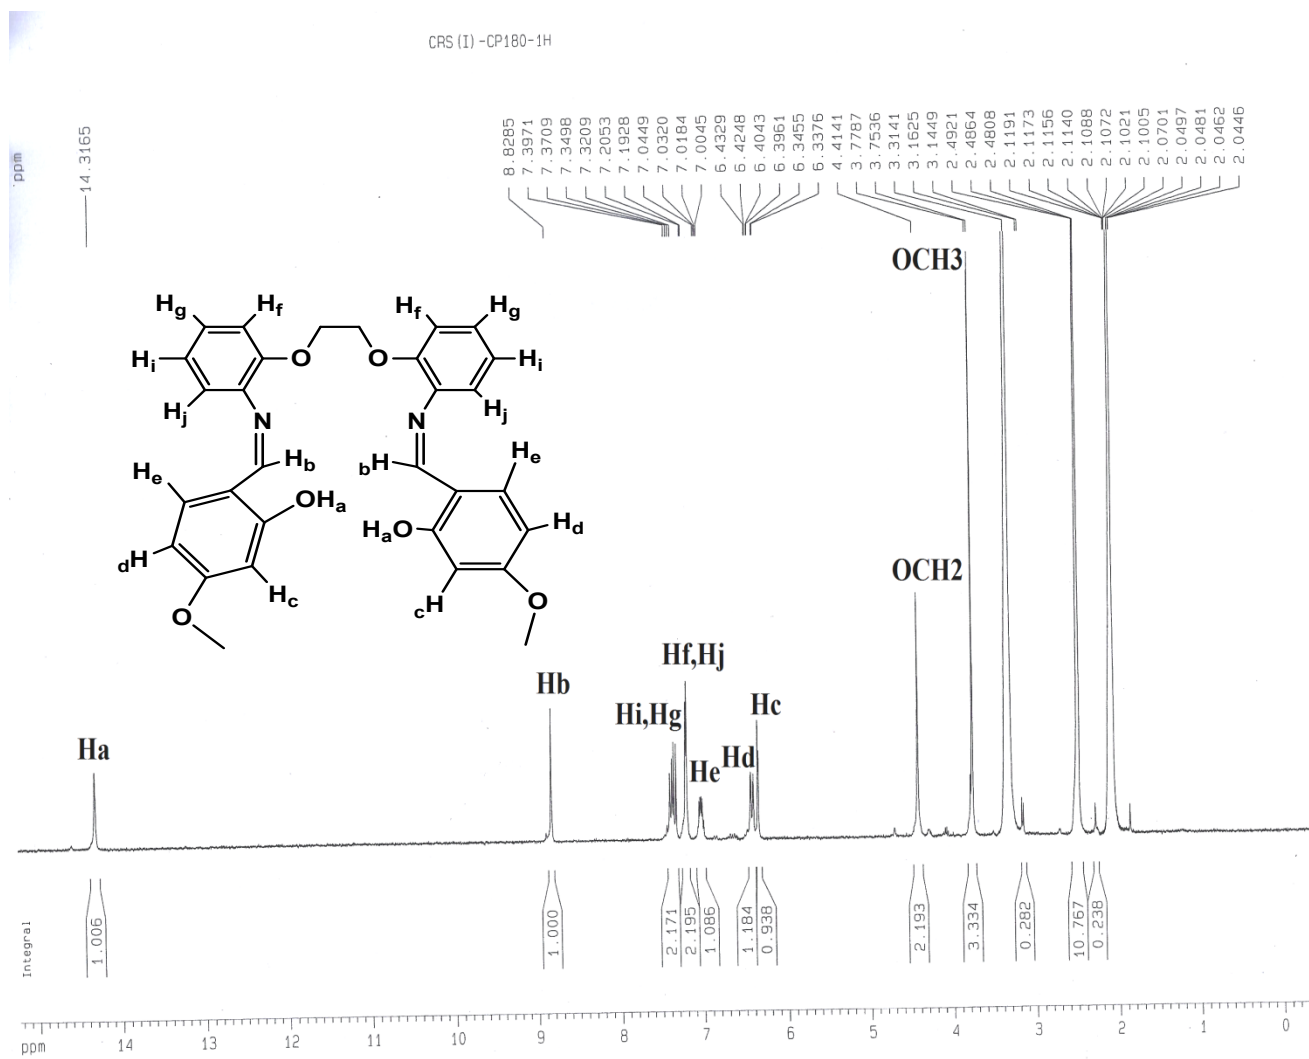

Fig. S3.  $^1\text{H}$ NMR spectrum of  $\text{H}_2\text{L}$  in  $\text{CDCl}_3$

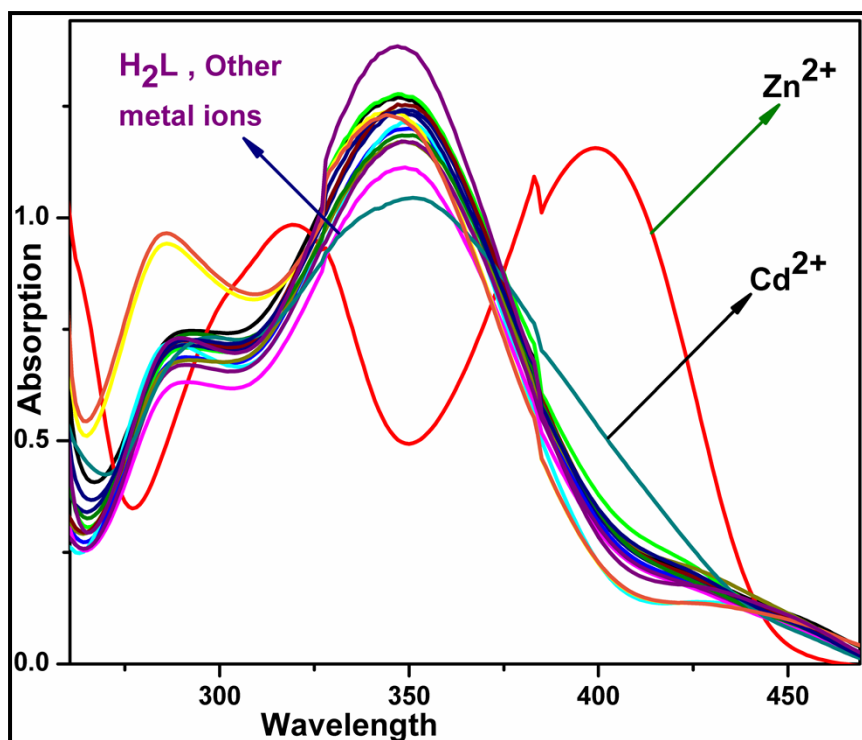

**Fig: S4.** Absorbance spectra of H<sub>2</sub>L upon addition of various metal ions in DMSO– buffer (HEPES, pH = 7.4) (v/v = 3/7) solution

#### OPTICAL DETECTION LIMIT:

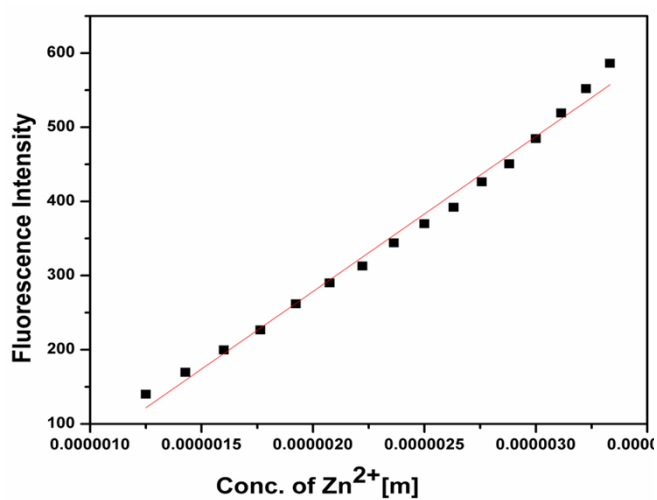

**Fig. S4.** The linear dynamic response of H<sub>2</sub>L for Zn<sup>2+</sup> and the determination of the detection limit (LOD) for Zn<sup>2+</sup>

#### BINDING CONSTANT

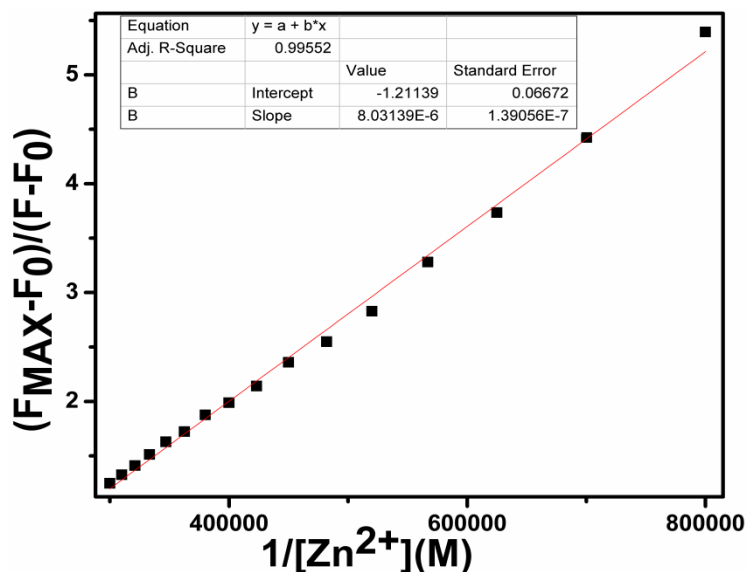

Fig. S5. Benesi-Hildebrand plot of  $\{(F_{\max}-F_0)/(F-F_0)\}$  vs.  $1/[Zn^{2+}]$ .

Benesi-Hildebrand equation is given as:

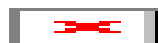

$F_0$  is the fluorescence of HL in the absence of externally added  $Zn^{2+}$ ,  $F$  is the fluorescence obtained at different  $[Zn^{2+}]$  ( $\lambda_{\text{ex}} = 346 \text{ nm}$  and  $\lambda_{\text{em}} = 470 \text{ nm}$ ) and with  $F_{\max}$  is the fluorescence of HL at  $[Zn^{2+}]$  in large excess.  $K$  ( $M^{-2}$ ) is the association constant.

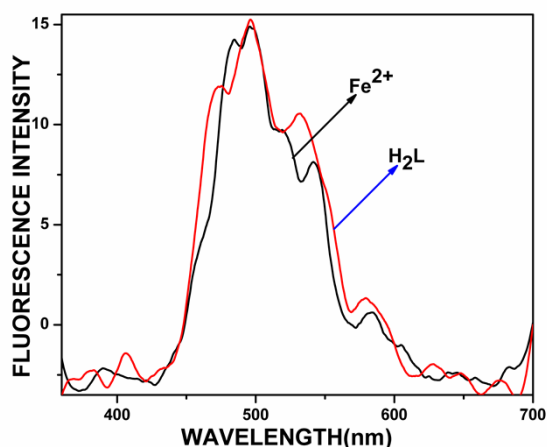

Fig. S6.. Change in fluorescence intensity of  $H_2L$  upon addition of  $50 \mu M$   $Fe^{2+}$  in DMSO/Water (HEPES buffer, pH, 7.4; v/v, 3/7).

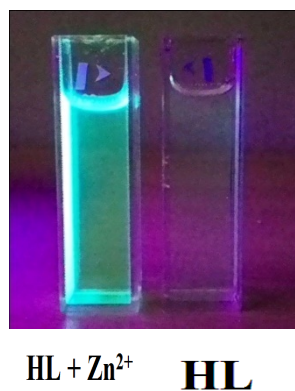

Fig. S7. Comparison of emission of H<sub>2</sub>L and [ZnL] under illumination in UV chamber

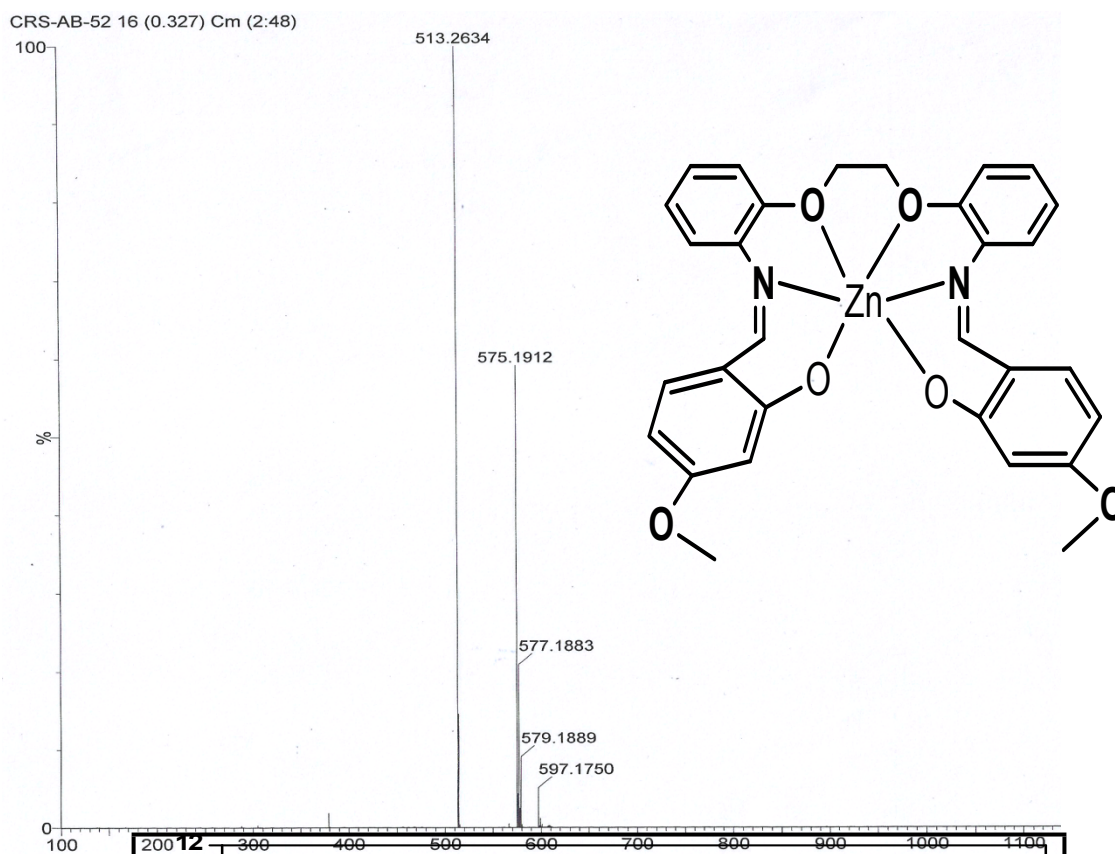

Fig. S8.  
Mass  
spectrum of  
[ZnL]

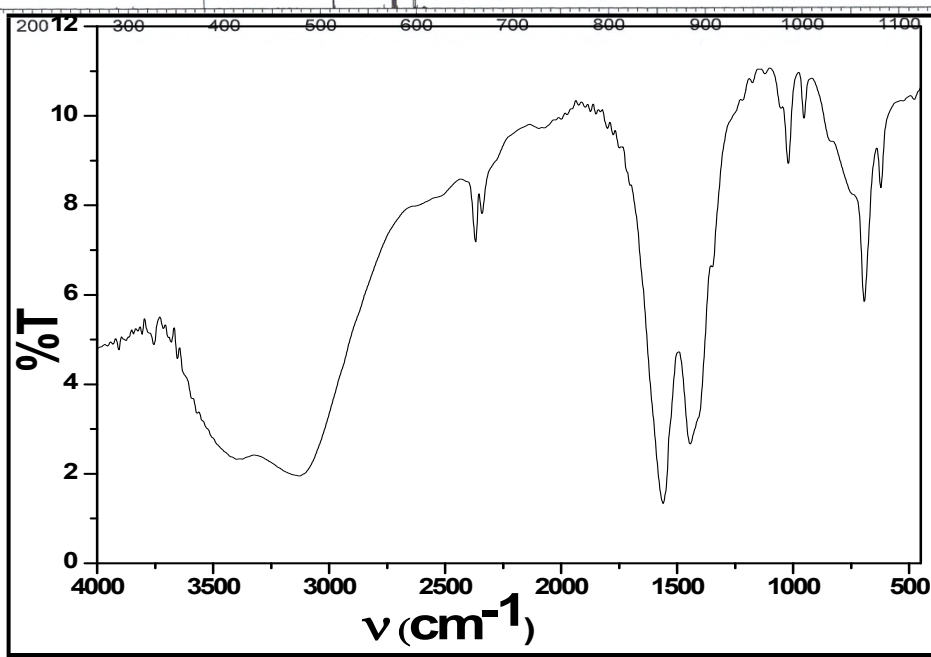

**Fig. S9.** FT-IR spectrum of [ZnL] in KBr disc

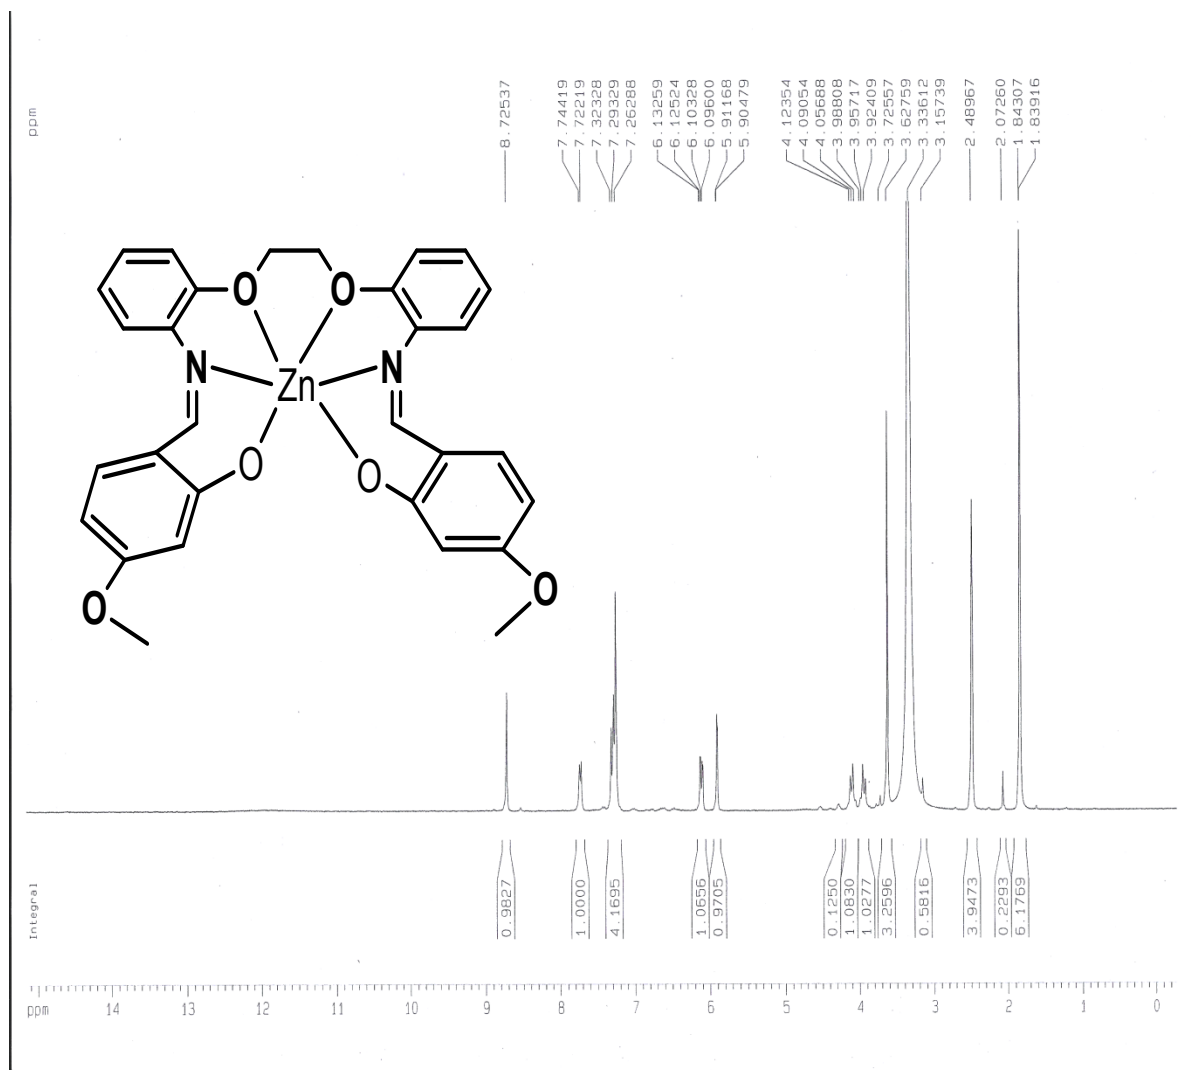

**Fig. S10.**  $^1\text{H}$  NMR spectrum of [ZnL] in  $\text{DMSO-d}_6$



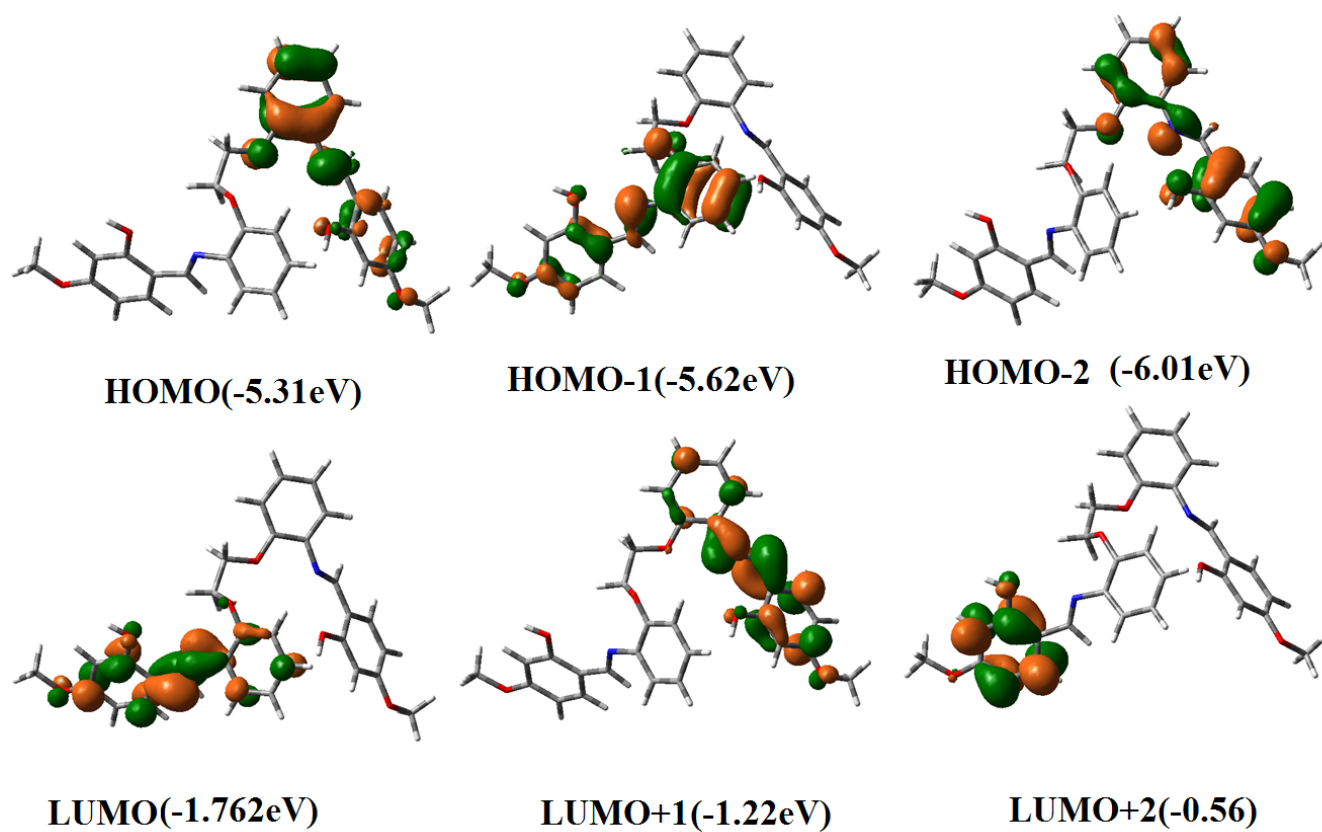

**Fig S11:** Frontier molecular orbitals of H<sub>2</sub>L

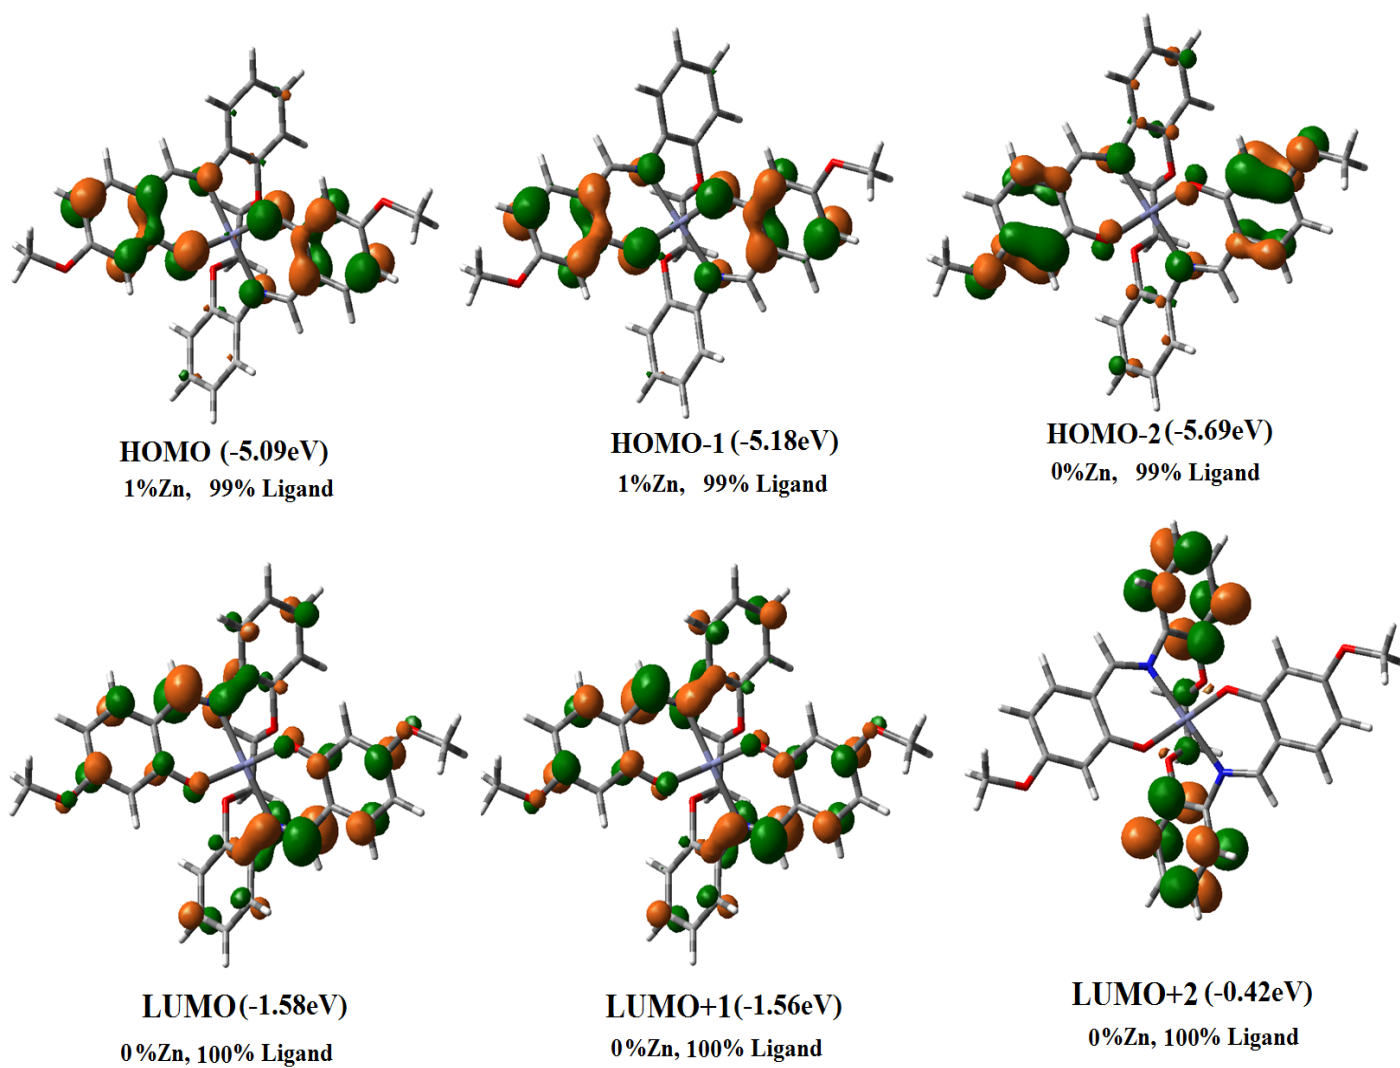

**Fig S11:** Frontier molecular orbitals of [ZnL]

**Table S1.** Composition and energy of MOs [ZnL]

| Orbital | Energy(eV) | Composition |        |
|---------|------------|-------------|--------|
|         |            | Metal       | Ligand |
| LUMO+10 | 1.61       | 14          | 86     |
| LUMO+9  | 1.56       | 3           | 97     |
| LUMO+8  | 1.43       | 9           | 91     |
| LUMO+7  | 0.54       | 1           | 99     |
| LUMO+6  | 0.54       | 0           | 100    |
| LUMO+5  | 0.14       | 1           | 99     |
| LUMO+4  | 0.12       | 1           | 99     |
| LUMO+3  | -0.38      | 1           | 99     |
| LUMO+2  | -0.42      | 0           | 100    |
| LUMO+1  | -1.56      | 0           | 100    |
| LUMO    | -1.58      | 0           | 100    |
| HOMO    | -5.09      | 1           | 99     |
| HOMO-1  | -5.18      | 1           | 99     |
| HOMO-2  | -5.69      | 0           | 100    |
| HOMO-3  | -5.72      | 0           | 100    |
| HOMO-4  | -6.16      | 2           | 98     |
| HOMO-5  | -6.28      | 2           | 98     |
| HOMO-6  | -6.77      | 1           | 99     |
| HOMO-7  | -6.87      | 1           | 99     |
| HOMO-8  | -7.01      | 0           | 100    |
| HOMO-9  | -7.02      | 0           | 100    |
| HOMO-10 | -7.86      | 3           | 97     |

**Table S2:** Comparison of theoretical and experimental spectral transitions and their assignment in H<sub>2</sub>L and [ZnL]

| Compd | Experimental<br>[ $\lambda_{\text{exp}}$ (nm)] | Theoretical<br>[ $\lambda_{\text{theo}}$ (nm)] | Electronic Transition                               | f      | Character |
|-------|------------------------------------------------|------------------------------------------------|-----------------------------------------------------|--------|-----------|
| HL    | 373                                            | 362                                            | S <sub>0</sub> → S <sub>2</sub> [HOMO-1→LUMO (86%)] | 0.2995 | ILCT      |
| HL    | 290                                            | 303                                            | S <sub>0</sub> → S <sub>6</sub> [HOMO-3→LUMO (72%), | 0.1216 | ILCT      |
| [ZnL] | 400                                            | 392                                            | S <sub>0</sub> → S <sub>1</sub> [HOMO→LUMO(98%)]    | 0.1013 | ILCT      |
| [ZnL] | 316                                            | 331                                            | S <sub>0</sub> → S <sub>4</sub> [HOMO-2→LUMO (82%)] | 0.4958 | ILCT      |

**Table S3:** Bond parameters of H<sub>2</sub>L

| Bond Distance (Å) |       | Bond angle (°)    |        |
|-------------------|-------|-------------------|--------|
| O(1)-C(2)         | 1.353 | O(1)-C(2)-C(3)    | 118.35 |
| C(17)-O(18)       | 1.361 |                   |        |
| C(4)-N(5)         | 1.281 | C(4)-N(5)-C(6)    | 120.59 |
| N(14)-C(15)       | 1.283 |                   |        |
| N(5)-C(6)         | 1.398 | C(7)-O(8)-C(9)    | 119.98 |
| C(13)-N(14)       | 1.404 |                   |        |
| C(7)-O(8)         | 1.361 | C(9)-C(10)-O(11)  | 108.36 |
| O(11)-C(12)       | 1.366 |                   |        |
| O(8)-C(9)         | 1.421 | C(10)-O(11)-C(12) | 121.20 |
| C(10)-O(11)       | 1.434 |                   |        |

**Table S4:** Bond parameters of [ZnL]

| Bond Distance (Å) |       | Bond angle (°)   |        |
|-------------------|-------|------------------|--------|
| Zn-O(1)           | 1.993 | O(1)-Zn-N(5)     | 88.66  |
| Zn-O(18)          | 1.993 | O(18)-Zn-N(14)   | 88.66  |
| Zn-N(5)           | 2.131 | N(5)-Zn-O(8)     | 71.17  |
| Zn-N(14)          | 2.132 | N(14)-Zn-O(11)   | 71.16  |
| Zn-O(8)           | 2.493 | O(8)-Zn-O(18)    | 88.66  |
| Zn-O(8)           | 2.492 | O(11)-Zn-O(1)    | 88.67  |
| O(1)-C(2)         | 1.317 | O(1)-C(2)-C(3)   | 122.89 |
| C(17)-O(18)       | 1.317 |                  |        |
| C(4)-N(5)         | 1.325 | C(4)-N(5)-C(6)   | 120.65 |
| N(14)-C(15)       | 1.326 |                  |        |
| C(7)-O(8)         | 1.419 | C(7)-O(8)-C(9)   | 114.95 |
| O(11)-C(12)       | 1.420 |                  |        |
| O(8)-C(9)         | 1.474 | C(9)-C(10)-O(11) | 106.59 |
| C(10)-O(11)       | 1.475 |                  |        |
